# Supplementary material
Source: PubMed Central journal article supplement (PMC6980981)
Supplement: NIHMS1061945-supplement-Appendix_Table_1.pdf [file NIHMS1061945-supplement-Appendix_Table_1.pdf]

**Appendix Table 1. Summary cause of death classification scheme and ICD-10 codes**

| Summary Cause of Death                | Classification Scheme                                                                                                                                                                                                                                                               |
|---------------------------------------|-------------------------------------------------------------------------------------------------------------------------------------------------------------------------------------------------------------------------------------------------------------------------------------|
| Congenital anomalies                  | <ul style="list-style-type: none"> <li>• ICD-10 underlying cause-of-death code of: Q00–Q99</li> </ul>                                                                                                                                                                               |
| Preterm-related                       | <ul style="list-style-type: none"> <li>• Infant born preterm (&lt;37 weeks)<sup>a</sup></li> <li>• ICD-10 underlying cause-of-death code of: K550, P000, P010, P011, P015, P020, P021, P027, P070–P073, P102, P220–229, P250–279, P280, P281, P360–369, P520–523, or P77</li> </ul> |
| Other perinatal conditions            | <ul style="list-style-type: none"> <li>• All other ICD-10 underlying cause-of-death codes in P00–P96, regardless of prematurity</li> </ul>                                                                                                                                          |
| Sudden unexpected infant death (SUID) | <ul style="list-style-type: none"> <li>• ICD-10 underlying cause-of-death code of: R95, R99, and W75</li> </ul>                                                                                                                                                                     |
| Infection                             | <ul style="list-style-type: none"> <li>• ICD-10 underlying cause-of-death code of: A00–B99, G00, G03, I30, I33, I40, and J00–J42</li> </ul>                                                                                                                                         |
| Injury                                | <ul style="list-style-type: none"> <li>• ICD-10 underlying cause-of-death code of: J69, U01, V01–W74, and W76–Y36</li> </ul>                                                                                                                                                        |
| All other causes                      | <ul style="list-style-type: none"> <li>• All other ICD-10 underlying cause-of-death codes</li> </ul>                                                                                                                                                                                |

ICD-10: Statistical Classification of Diseases and Related Health Problems, 10th Revision

<sup>a</sup>Gestational age was calculated using the obstetric estimate of gestation at delivery.
